# Supplementary material
Source: publisher figshare collection journal article supplement (https://karger.figshare.com/ndownloader/files/36428466)
Supplement: Supplementary file 1 [file 36428466]

**Supplement S3 Descriptive statistics for all parameters**

| **Parameter** | | **Patients/**  **paired measurements** | **EC** | **TTE** | |
| --- | --- | --- | --- | --- | --- |
| ***Values indexed to bodyweight*** | | | | | |
|  | | | Rounded  bodyweight | | Exact bodyweight |
| **LV** | **SI** [mL/kg] | 24/44 | 1.39 (0.26) | 1.06 (0.29) | 1.07 (0.30) |
| **CI** [mL/kg/min] | 214 (38) | 163 (47) | 164 (50) |
| **RV** | **SI** [mL/kg] | 19/34 | 1.42 (0.28) | 1.56 (0.42) | 1.55 (0.42) |
| **CI** [mL/kg/min] | 213 (37) | 241 (77) | 239 (75) |
| ***Absolute values (not indexed to bodyweight)*** | | | | | |
| **LV** | **SV** [mL] | 24/44 | 1.42 (0.63) | 1.07 (0.45) | |
| **CO** [mL/min] | 217 (84) | 161 (60) | |
| **HR** [bpm] | 156 (16) | 153 (17) | |
| **RV** | **SV** [mL] | 19/34 | 1.61 (0.74) | 1.68 (0.60) | |
| **CO** [mL/min] | 234 (91) | 251 (85) | |
| **HR** [bpm] | 152 (16) | 152 (17) | |
| **LV-STI** | **PEP** [ms] | 25/41 | 81 (11) | 53 (8) | |
| **ET** [ms] | 166 (25) | 155 (19) | |
| **HR** [bpm] | 150 (16) | 153 (17) | |

Data presented as mean (SD) for electrical cardiometry (EC) and transthoracic echocardiography (TTE), mean (SD) calculated using random effects models, LV Left ventricular, RV right ventricular, SI stroke volume and CI cardiac output indexed to bodyweight, SV and CO cardiac output absolute values, PEP pre-ejection period, ET ejection time
